# Supplementary material
Source: PubMed Central journal article supplement (PMC2607195)
Supplement: NIHMS69689-supplement-01.pdf [file NIHMS69689-supplement-01.pdf]

Supplemental Data

Structure of RapA, a Swi2/Snf2 Protein  
that Recycles RNA Polymerase During Transcription

Gary Shaw, Jianhua Gan, Yan Ning Zhou, Huijun Zhi, Priadarsini Subburaman,  
Rongguang Zhang, Andrzej Joachimiak, Ding Jun Jin, and Xinhua Ji

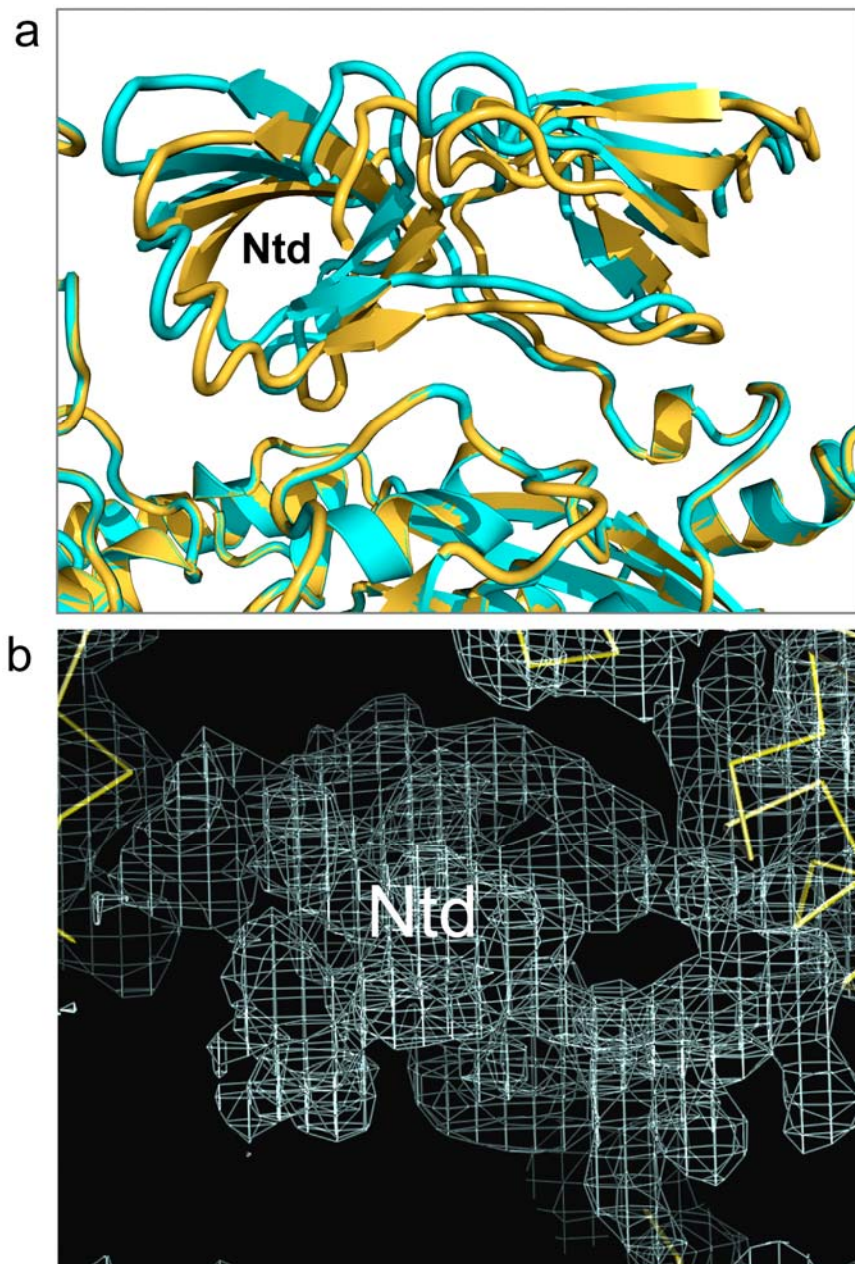

**Figure S1. The Ntd (N-Terminal Domain) of RapA**

(A) Of the two crystallographically independent molecules, the backbones of the Linker1-to-Ctd fragment are virtually identical and the backbones of the Ntd are similar, but the relative positioning of Ntd with respect to the rest of the molecule (Linker1-to-Ctd) is slightly different.

(B) Electron density for the Ntd (white net, calculated using combined phases from the SeMAD experiment and the Linker1-to-Ctd structure, contoured at the level of  $1\sigma$ ) outlines the domain structure.

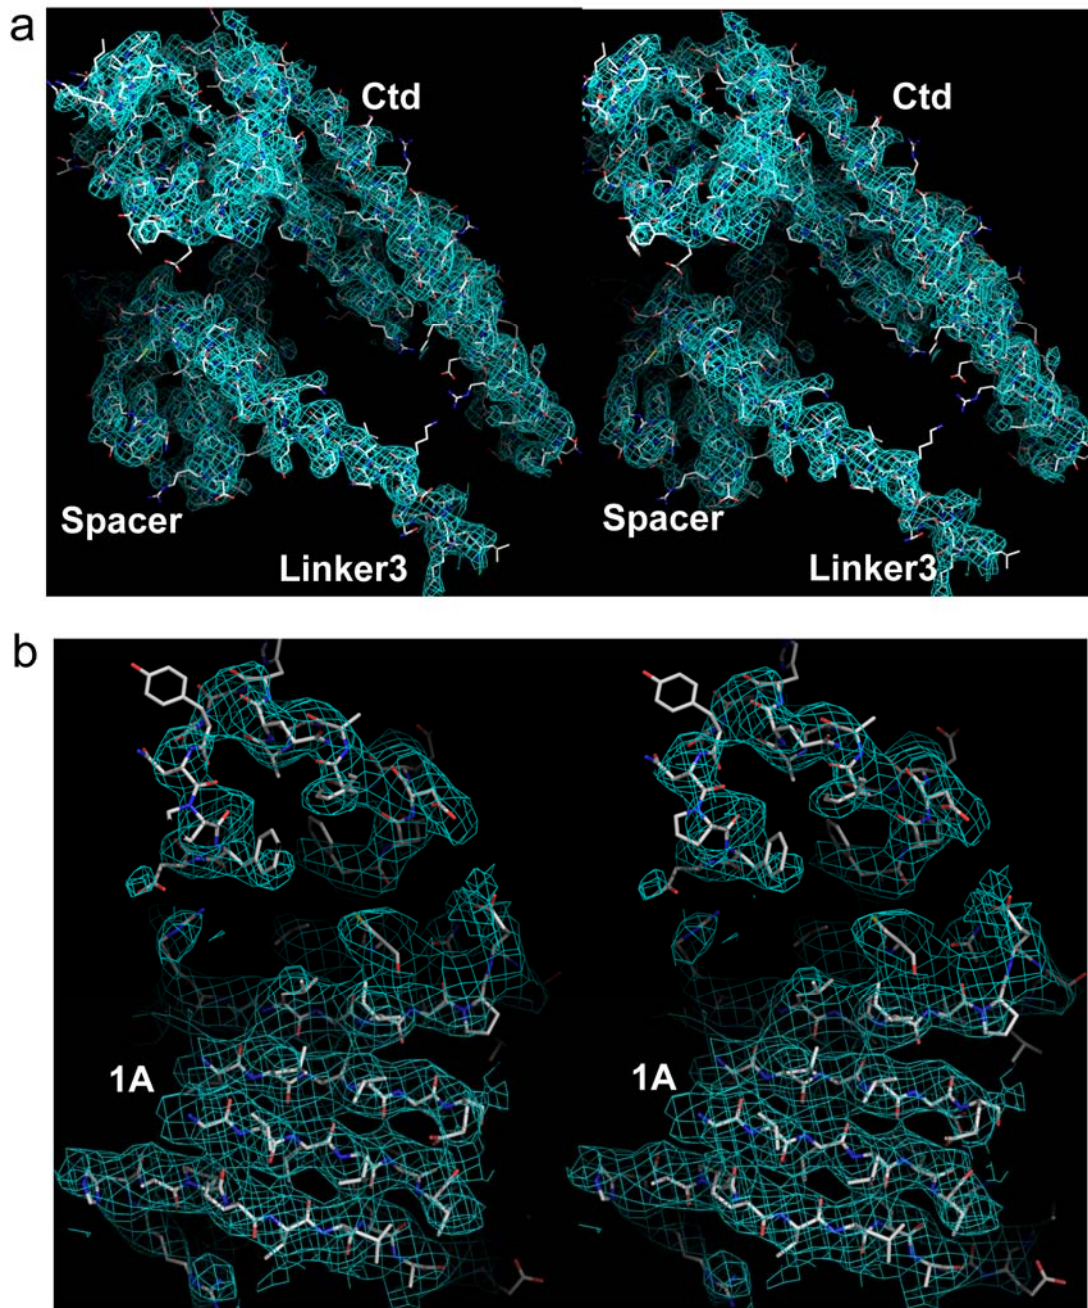

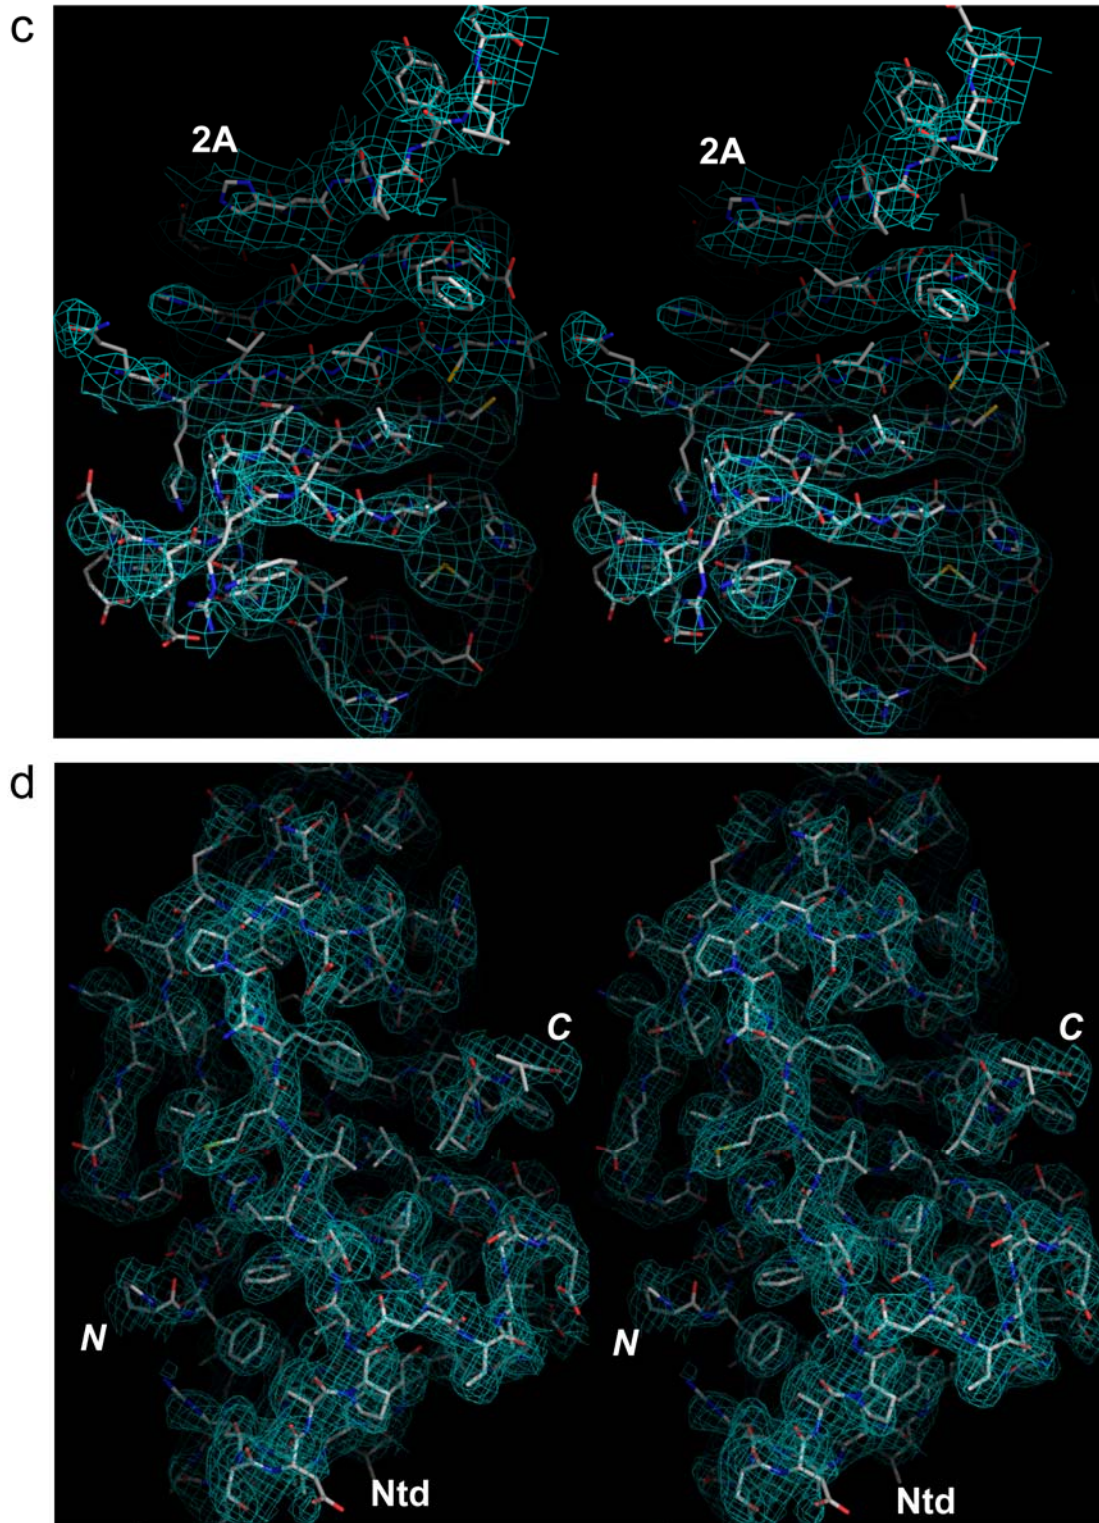

**Figure S2. Stereo Views Showing the Experimental Electron Density Maps**

Experimental electron density maps of *E. coli* RapA are superimposed with the final structure.

(A-C) Full length RapA (using SeMAD phases at 3.2-Å resolution, contoured at 1.0  $\sigma$ ).

(D) The Ntd of RapA (using SeSAD phases at 2.1-Å resolution, contoured at 1.0  $\sigma$ ).
